# Supplementary material for: Yttrium oxide modified Cu/ZnO/Al2O3catalysts via hydrotalcite-like precursors for CO2hydrogenation to methanol
Source: Royal Society of Chemistry journal article supplement (doi:10.1039/c5cy00372e), 2015-01-01
Supplement: c5cy00372e1.pdf [file c5cy00372e1.pdf]

## Supplementary Information for

### Yttrium oxide modified Cu/ZnO/Al<sub>2</sub>O<sub>3</sub> catalysts via hydrotalcite-like precursors for the CO<sub>2</sub> hydrogenation reaction to methanol

Peng Gao <sup>a,b</sup>, Liangshu Zhong <sup>b</sup>, Lina Zhang <sup>c</sup>, Hui Wang <sup>a,b</sup>, Ning Zhao <sup>c</sup>,

Wei Wei <sup>a,b,\*</sup>, Yuhan Sun <sup>b,c,\*</sup>

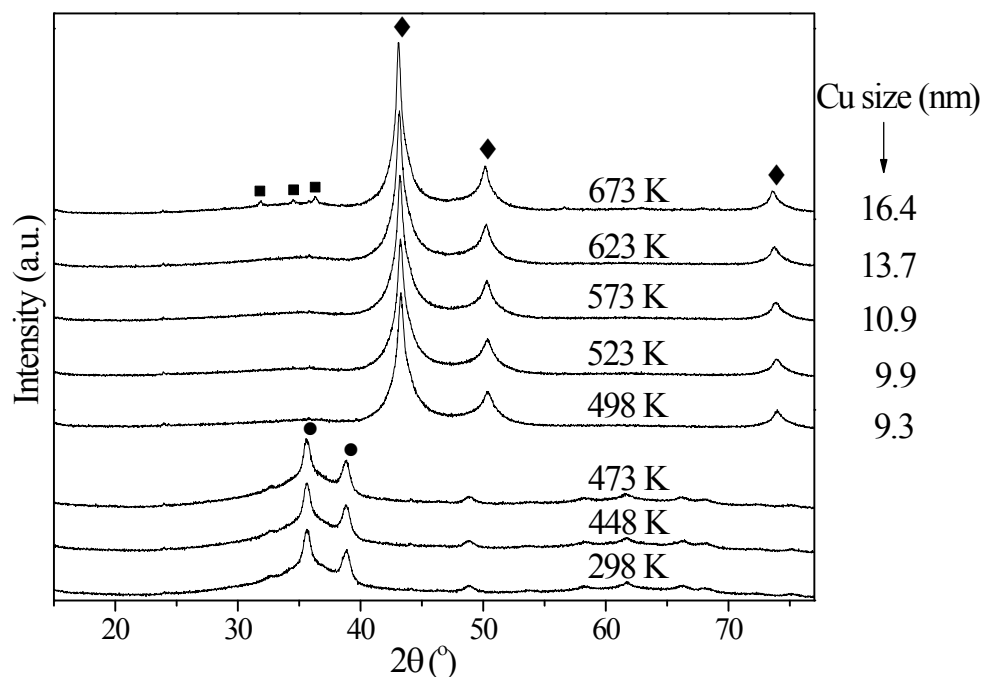

**Fig. S1** *In situ* XRD patterns collected during the reduction process of CHT-Y0 in 5% H<sub>2</sub>/He from 298 to 673 K. (●) CuO; (◆)Cu; (■) ZnO.

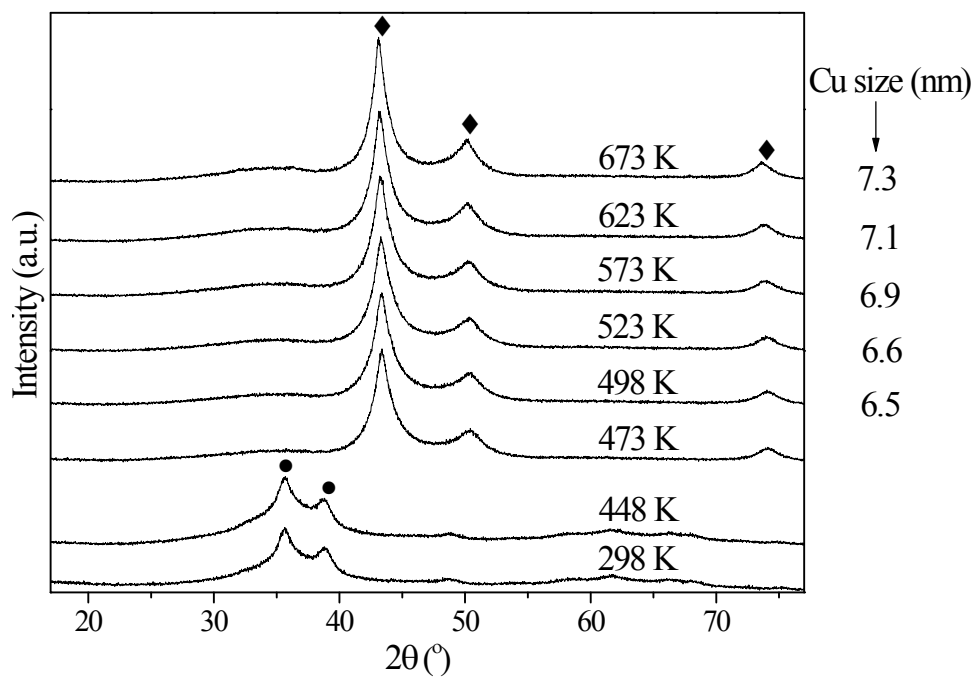

**Fig. S2** *In situ* XRD patterns collected during the reduction process of CHT-Y0.1 in 5%  $\text{H}_2/\text{He}$  from 298 to 673 K. (●) CuO; (◆)Cu.

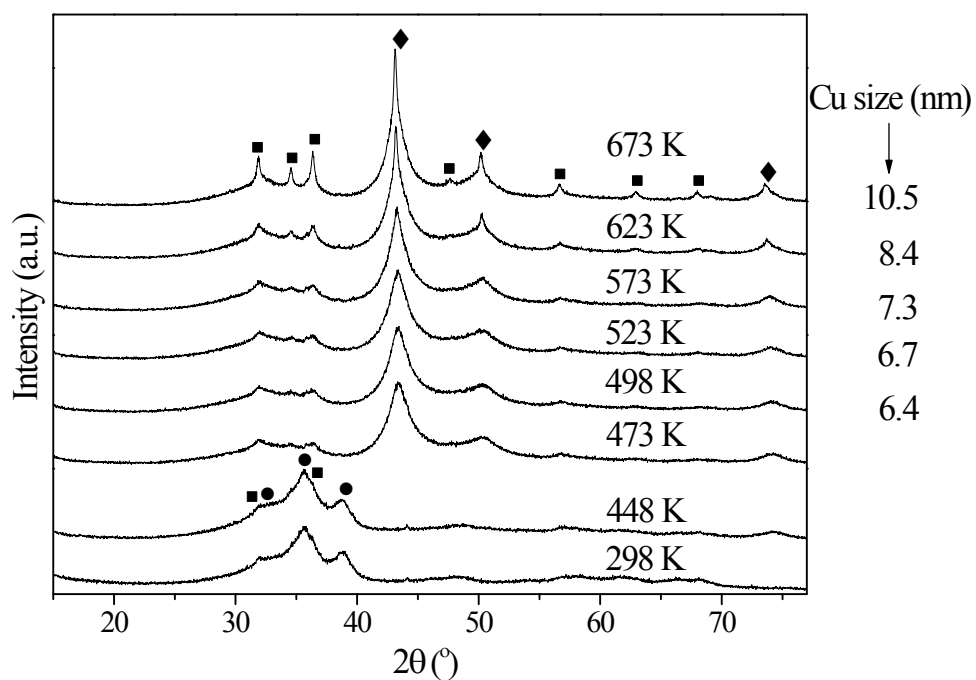

**Fig. S3** *In situ* XRD patterns collected during the reduction process of CHT-Y0.5 in 5%  $\text{H}_2/\text{He}$  from 298 to 673 K. (●) CuO; (◆)Cu; (■) ZnO.

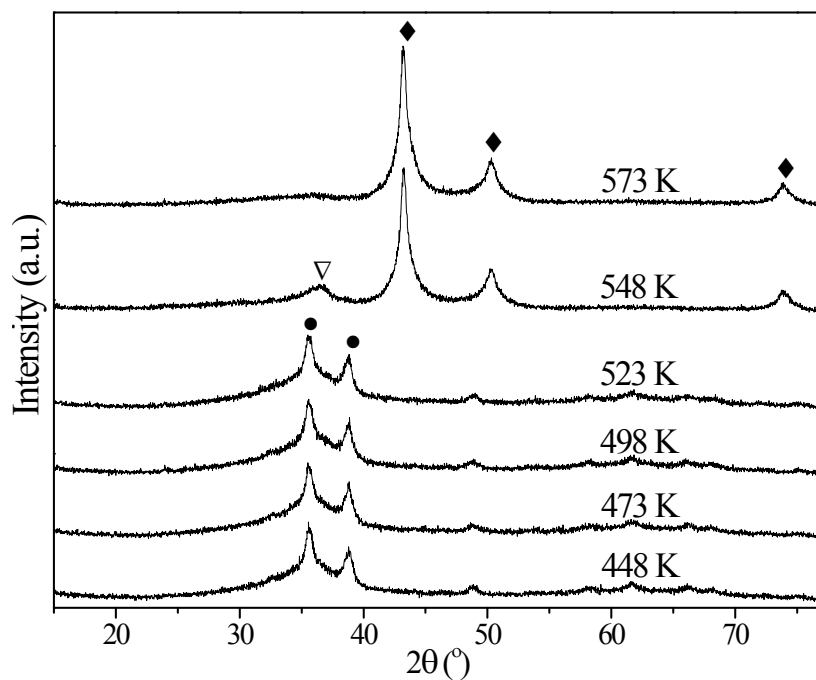

**Fig. S4** Phase evolution of CHT-Y0 sample recorded by *in situ* XRD during the heating of CHT-Y0.5 in 5% H<sub>2</sub>/He from 448 to 573 K at a heating rate of 5 K min<sup>-1</sup>.

(●) CuO; (▽) Cu<sub>2</sub>O; (◆)Cu.

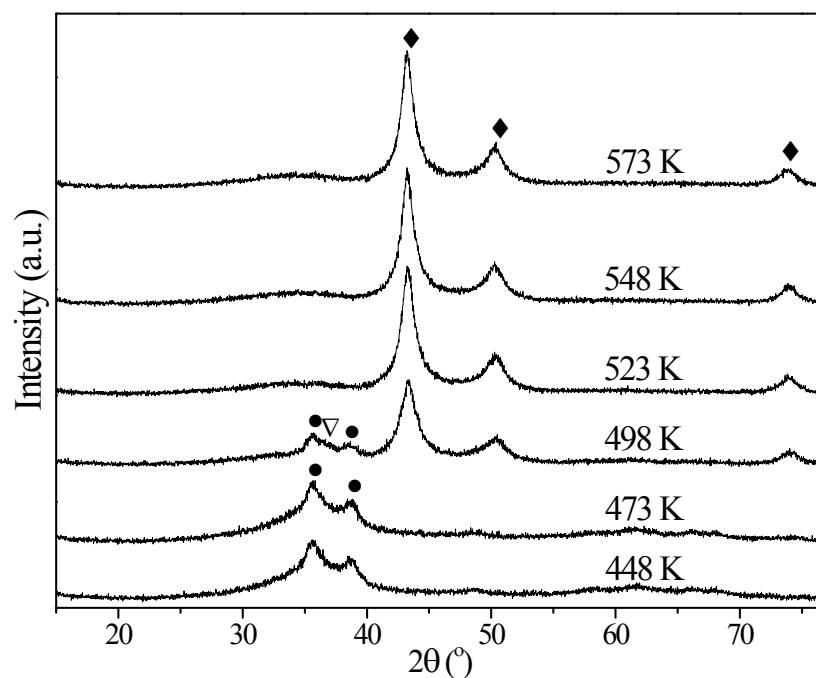

**Fig. S5** Phase evolution of CHT-Y0.1 sample recorded by *in situ* XRD during the heating of CHT-Y0.5 in 5% H<sub>2</sub>/He from 448 to 573 K at a heating rate of 5 K min<sup>-1</sup>.

(●) CuO; (▽) Cu<sub>2</sub>O; (◆)Cu.

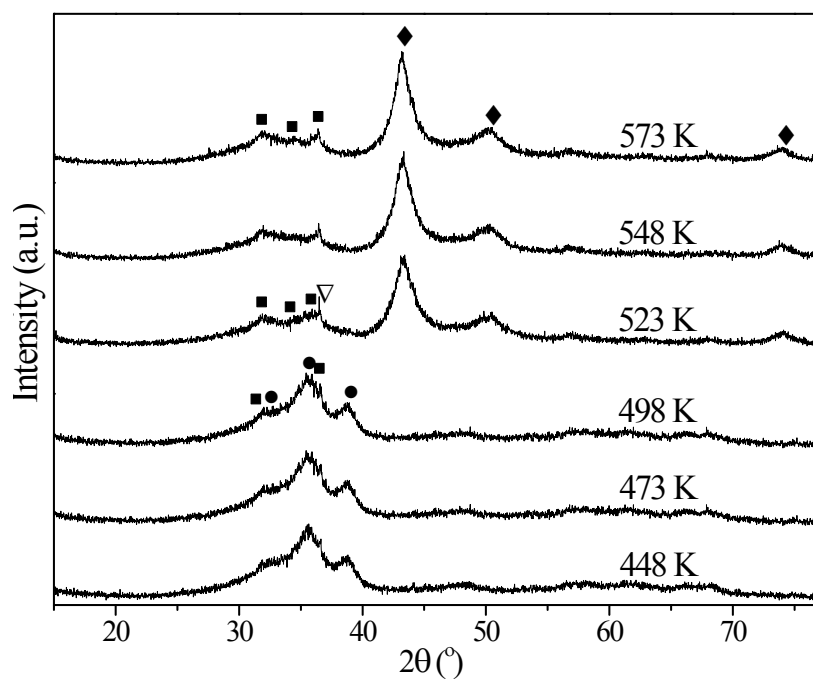

**Fig. S6** Phase evolution of CHT-Y0.5 sample recorded by *in situ* XRD during the heating of CHT-Y0.5 in 5% H<sub>2</sub>/He from 448 to 573 K at a heating rate of 5 K min<sup>-1</sup>.

(●) CuO; (▽) Cu<sub>2</sub>O; (◆)Cu; (■) ZnO.

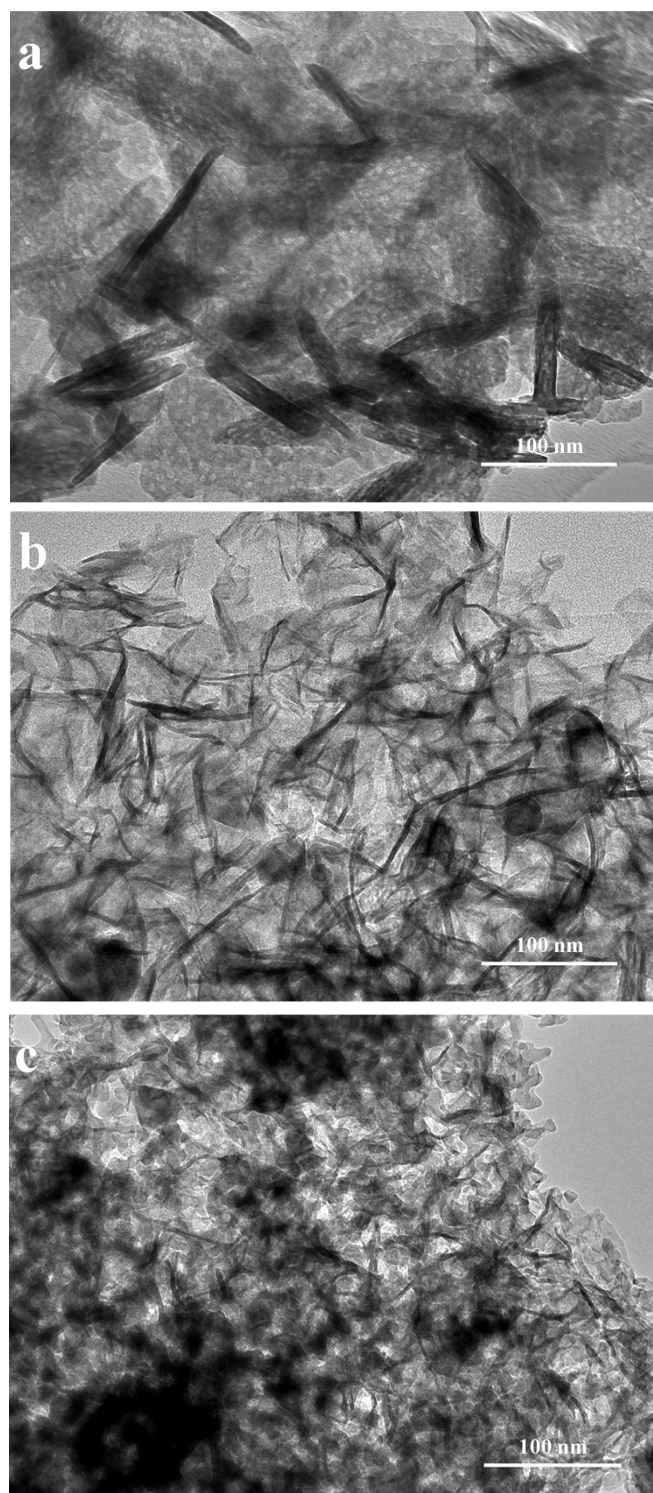

**Fig. S7** TEM images of calcined (a) CHT-Y0, (b) CHT-Y0.1 and (c) CHT-Y0.5 samples at 773 K for 4 h.

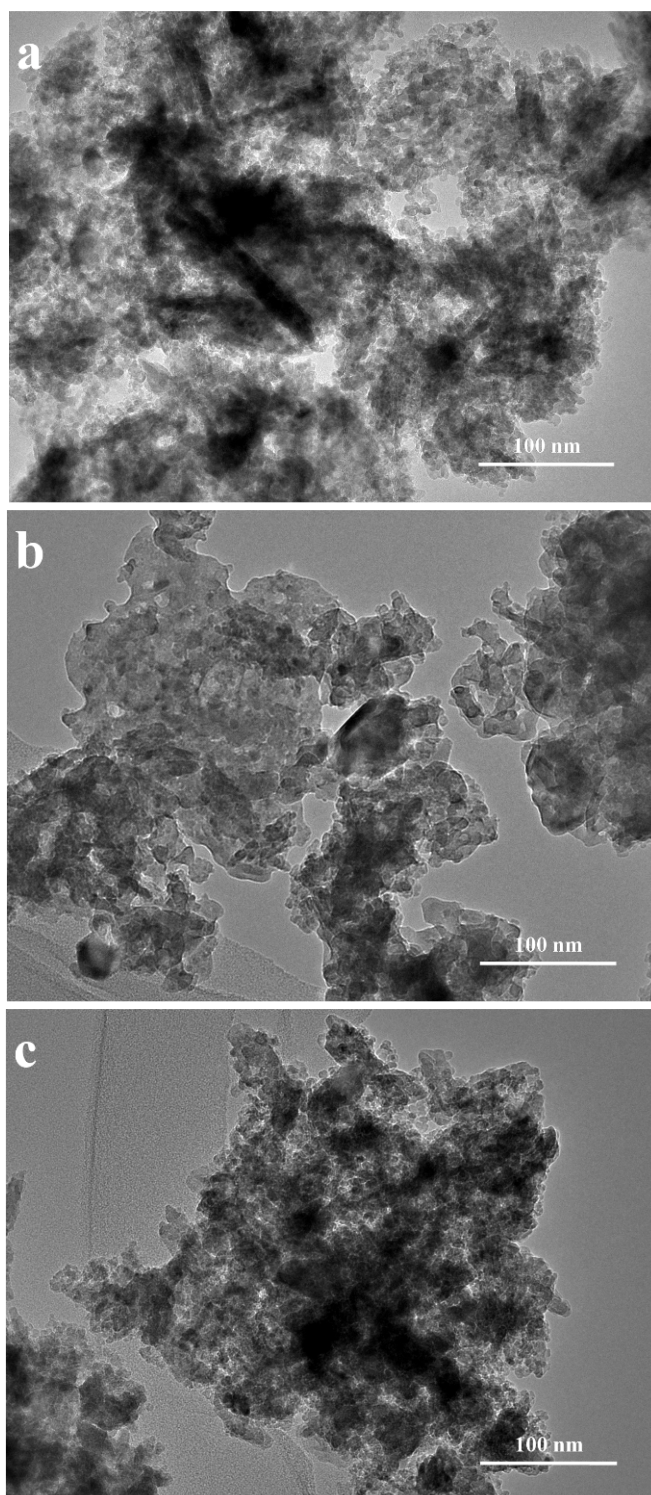

**Fig. S8** TEM images of spent (a) CHT-Y0, (b) CHT-Y0.1 and (c) CHT-Y0.5 catalysts after 500 h.

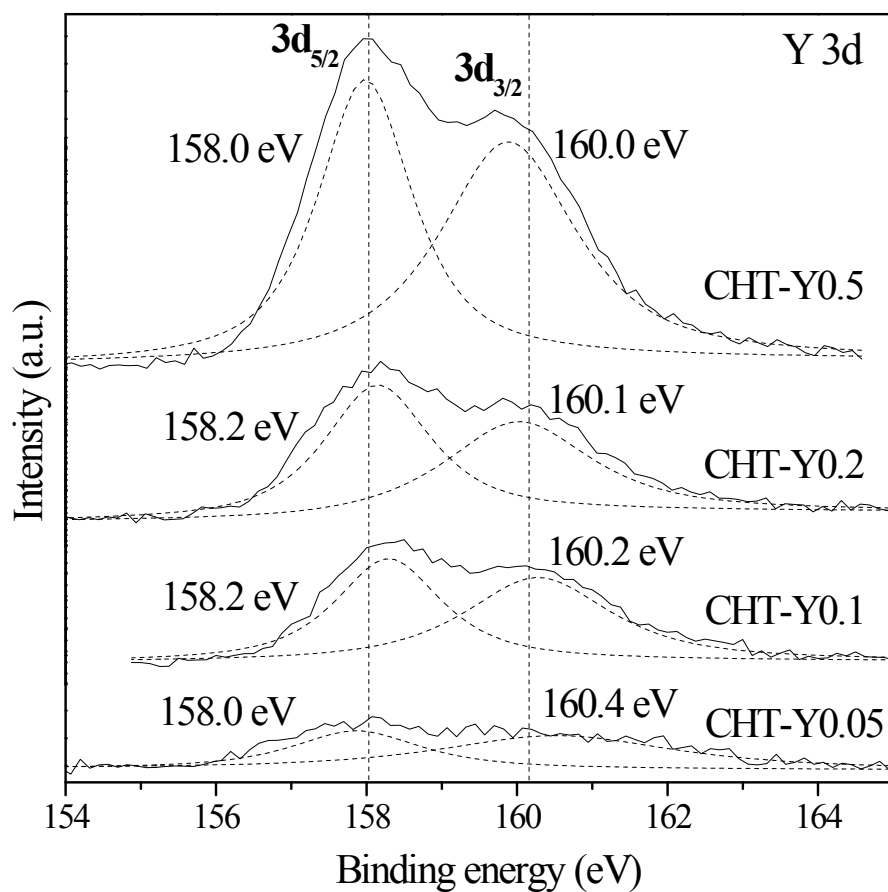

**Fig. S9** XPS spectra of Y 3d core-level for the reduced CHT-Y<sub>x</sub> catalysts.

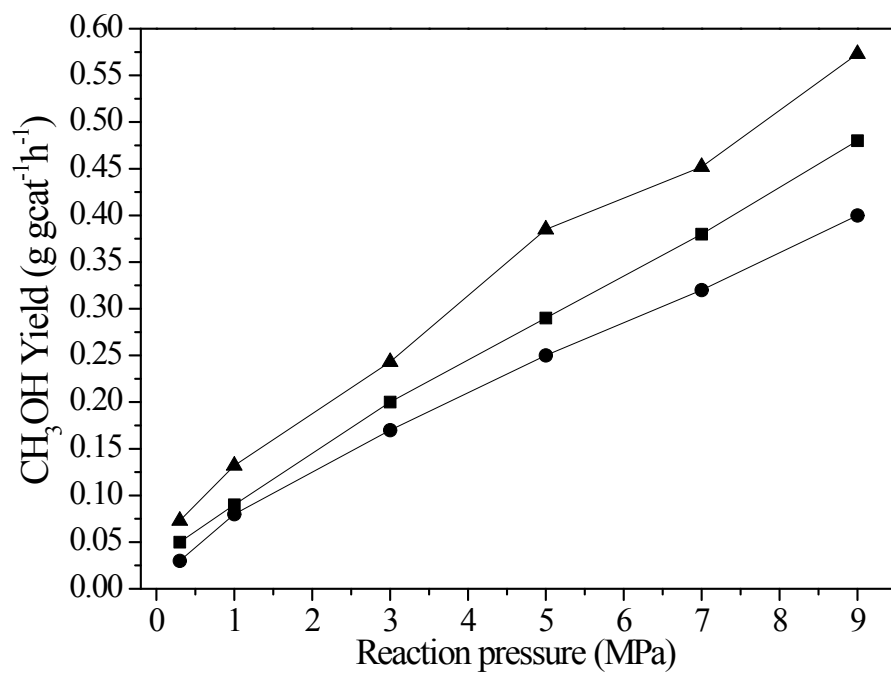

**Fig. S10** Effect of reaction pressure on the yield of methanol over (circles) CHT-Y0, (triangles) CHT-Y0.1 and (rectangles) CHT-Y0.5 catalysts. Reaction conditions: T = 503 K, GHSV = 10,000 mL gcat<sup>-1</sup> h<sup>-1</sup>, H<sub>2</sub>/CO<sub>2</sub>/N<sub>2</sub> = 73/24/3 (molar ratio).
